# Supplementary material for: An innovative biologic system for photon-powered myocardium in the ischemic heart
Source: PubMed Central journal article supplement — Sci Adv. 2017 Jun 14;3(6):e1603078. doi: 10.1126/sciadv.1603078 (PMC5470824; doi:10.1126/sciadv.1603078), 2017-06-14
Supplement: 1603078_SM.pdf [file 1603078_SM.pdf]

## Supplementary Materials for

### **An innovative biologic system for photon-powered myocardium in the ischemic heart**

Jeffrey E. Cohen, Andrew B. Goldstone, Michael J. Paulsen, Yasuhiro Shudo, Amanda N. Steele, Bryan B. Edwards, Jay B. Patel, John W. MacArthur Jr., Michael S. Hopkins, Casey E. Burnett, Kevin J. Jaatinen, Akshara D. Thakore, Justin M. Farry, Vi N. Truong, Alexandra T. Bourdillon, Lyndsay M. Stapleton, Anahita Eskandari, Alexander S. Fairman, William Hiesinger, Tatiana V. Esipova, William L. Patrick, Keven Ji, Judith A. Shizuru, Y. Joseph Woo

Published 14 June 2017, *Sci. Adv.* **3**, e1603078 (2017)

DOI: 10.1126/sciadv.1603078

#### **This PDF file includes:**

- fig. S1. High-resolution grayscale scanning electron micrograph before false coloring.
- fig. S2. High-resolution false-colored scanning electron micrograph.
- fig. S3. In vivo rodent model of acute myocardial infarction.
- table S1. Effect of *S. elongatus* therapy on myocardial oxygenation in acute ischemia model.
- table S2. Effect of *S. elongatus* therapy on myocardial surface temperature in acute ischemia model.
- table S3. Effect of *S. elongatus* therapy on LV hemodynamics in acute ischemia model.
- table S4. Effect of *S. elongatus* therapy on CO in acute ischemia model.
- table S5. Long-term effect of *S. elongatus* therapy on LV function in IR model.

## Supplementary Materials

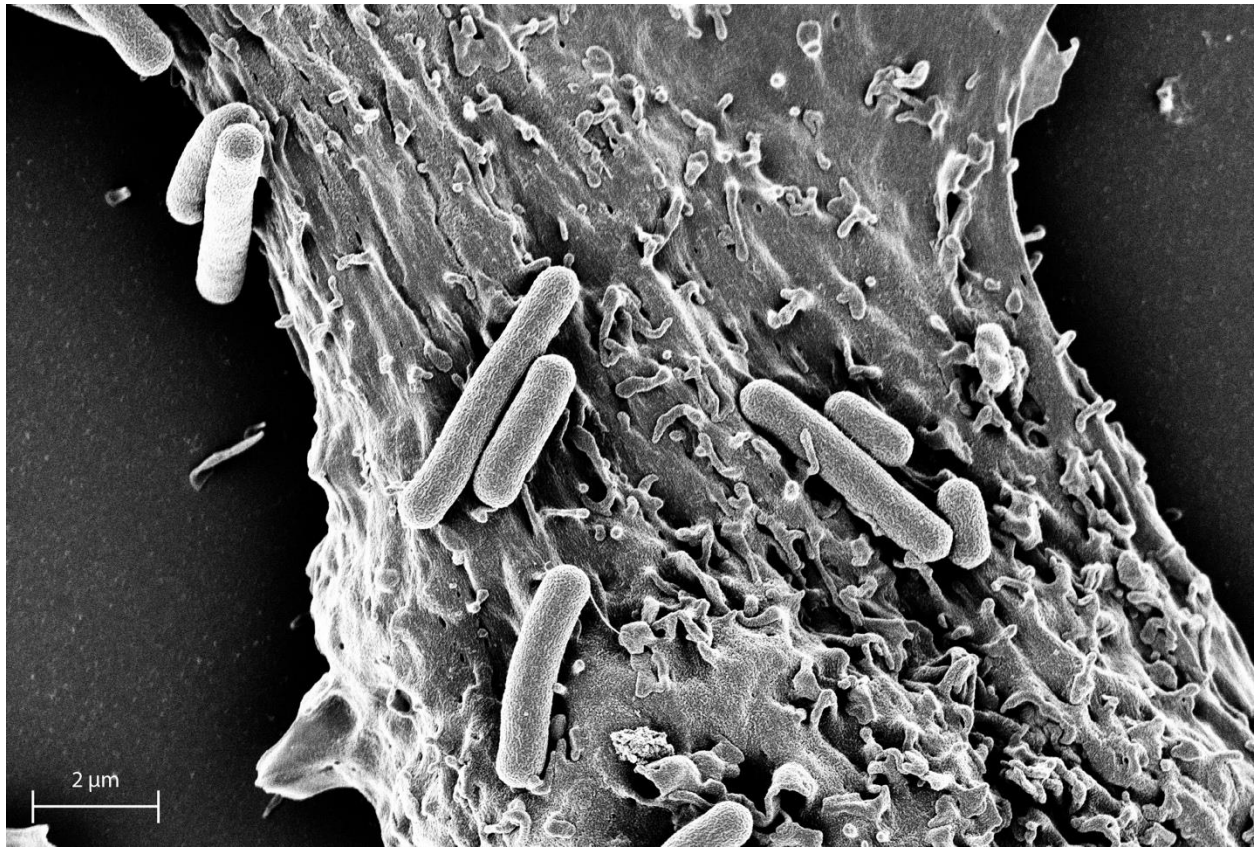

**fig. S1. High-resolution grayscale scanning electron micrograph before false coloring.** Rodent cardiomyocyte cocultured with *S. elongatus*. Taken with a Zeiss Sigma FESEM with EHT 2.00 kV, WD 5.2 mm, Signal A InLens, Mag 5.73 KX.

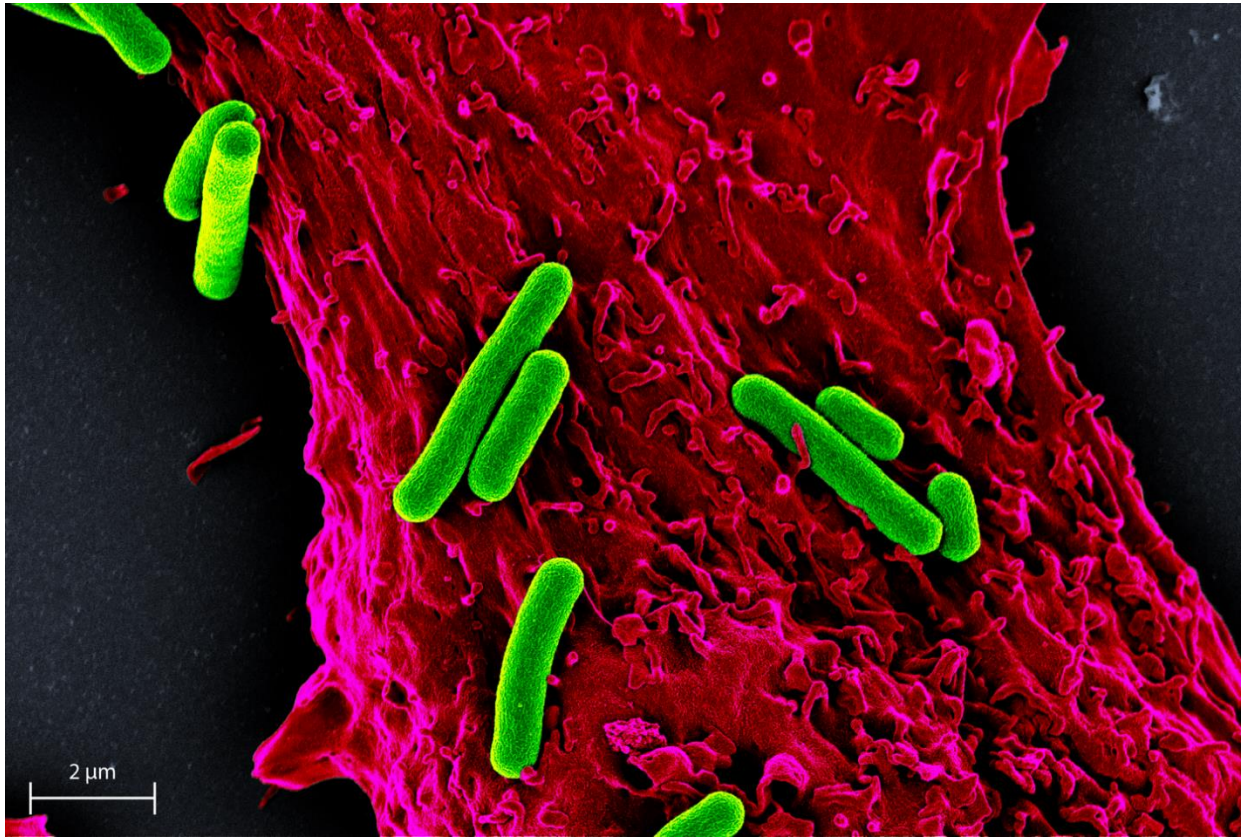

**fig. S2. High-resolution false-colored scanning electron micrograph.** Rodent cardiomyocyte cocultured with *S. elongatus*. Taken with a Zeiss Sigma FESEM with EHT 2.00 kV, WD 5.2 mm, Signal A InLens, magnification 5.73 KX. False-color image created with Adobe Photoshop.

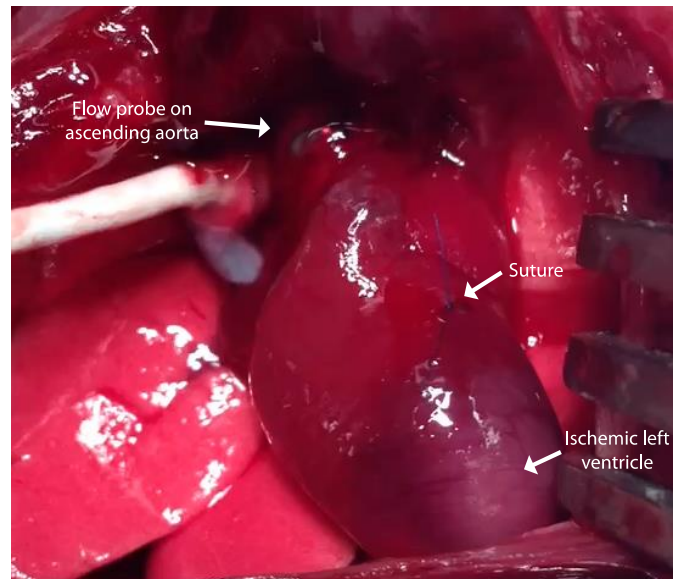

**fig. S3. In vivo rodent model of acute myocardial infarction.** Viewed through a median sternotomy incision, a flow probe is placed around the ascending aorta and the left anterior descending coronary artery is ligated with a monofilament suture. The area of ischemic left ventricle is noted by its pale appearance.

**table S1. Effect of *S. elongatus* therapy on myocardial oxygenation in acute ischemia model.**

|                                                                       | Control (n=5) | <i>S. elongatus</i> dark (n=5) | <i>S. elongatus</i> light (n=5) | P value |
|-----------------------------------------------------------------------|---------------|--------------------------------|---------------------------------|---------|
| Baseline O <sub>2</sub> (torr)                                        | 30.7±5.7      | 31.6±9.3                       | 27.3±4.1                        | 0.3     |
| 10 minutes post-injection O <sub>2</sub> (torr)                       | 3.2±1.0       | 1.4±0.8                        | 8.8±1.3                         | 0.004   |
| 20 minutes post-injection O <sub>2</sub> (torr)                       | 3.1±0.3       | 1.7±1.0                        | 10.5±5.1                        | 0.003   |
| 10 minutes post-injection O <sub>2</sub> normalized to ischemia nadir | 2.7±0.9       | 2.5±1.5                        | 24.6±6.4                        | 0.002   |
| 20 minutes post-injection O <sub>2</sub> normalized to ischemia nadir | 1.8±0.5       | 3.3±1.9                        | 24.4±10.2                       | 0.004   |

**table S2. Effect of *S. elongatus* therapy on myocardial surface temperature in acute ischemia model.**

|                                                              | Control (n=5) | <i>S. elongatus</i> (n=5) | P value |
|--------------------------------------------------------------|---------------|---------------------------|---------|
| Baseline temperature (°F)                                    | 94.67±1.13    | 94.78±1.02                | >0.5    |
| Infarct temperature normalized to baseline                   | 0.974±0.003   | 0.979±0.012               | >0.5    |
| 10 minutes post-injection temperature normalized to baseline | 0.969±0.002   | 0.976±0.009               | 0.29    |
| 20 minutes post-injection temperature normalized to baseline | 0.956±0.004   | 0.981±0.01                | 0.04    |

**table S3. Effect of *S. elongatus* therapy on LV hemodynamics in acute ischemia model.**

|                  | BASELINE      |                           |         | INFARCT       |                           |         | 45 MINUTES POST-INJECTION |                           |         |
|------------------|---------------|---------------------------|---------|---------------|---------------------------|---------|---------------------------|---------------------------|---------|
|                  | Control (n=5) | <i>S. elongatus</i> (n=5) | P value | Control (n=5) | <i>S. elongatus</i> (n=5) | P value | Control (n=5)             | <i>S. elongatus</i> (n=5) | P value |
| Pmax (mmHg)      | 91.1±9.4      | 95.3±11.1                 | >0.5    | 88.0±10.2     | 96.8±10.2                 | >0.5    | 72.0±11.5                 | 102.2±8.8                 | 0.04    |
| dP/dt (mmHg/sec) | 4876±610      | 4821±834                  | >0.5    | 3749±300      | 4298±827                  | >0.5    | 2759±281                  | 4851±725                  | 0.02    |

**table S4. Effect of *S. elongatus* therapy on CO in acute ischemia model.**

|                                                   | Control (n=5) | <i>S. elongatus</i> without infarct (n=5) | <i>S. elongatus</i> dark (n=5) | <i>S. elongatus</i> light (n=5) | P value |
|---------------------------------------------------|---------------|-------------------------------------------|--------------------------------|---------------------------------|---------|
| Baseline cardiac output (mL/min)                  | 30.8±3.4      | 35.0±3.5                                  | 33.4±2.9                       | 33.4±3.7                        | 0.7     |
| 15 minute post-infarction cardiac output (mL/min) | 23.4±3.7      | N/A                                       | 26.4±2.1                       | 27.2±2.4                        | 0.53    |
| 45 minute post-injection cardiac output (mL/min)  | 19±3.4        | 35.8±3.7                                  | 23.6±4.0                       | 30.3±4.8                        | 0.05    |

**table S5. Long-term effect of *S. elongatus* therapy on LV function in IR model.**

|                                                    | Saline control (n=7) | <i>S. elongatus</i> (n=10) | P value |
|----------------------------------------------------|----------------------|----------------------------|---------|
| Troponin (ng/mL)                                   | 16.5±10.5            | 6.5±4.8                    | 0.05    |
| Ejection fraction (%)                              | 36.9±4.7             | 48.3±10.5                  | 0.02    |
| End-systolic volume (μL)                           | 487±140              | 327±133                    | 0.03    |
| Slope of end-systolic pressure-volume relationship | 0.19±0.08            | 0.35±0.12                  | 0.01    |
